# Supplementary material
Source: HighWire-hosted journal article supplement (doi:10.1101/rna.079761.123)
Supplement: Supplemental_Figures_1-5.pdf [file Supplemental_Figures_1-5.pdf]

A

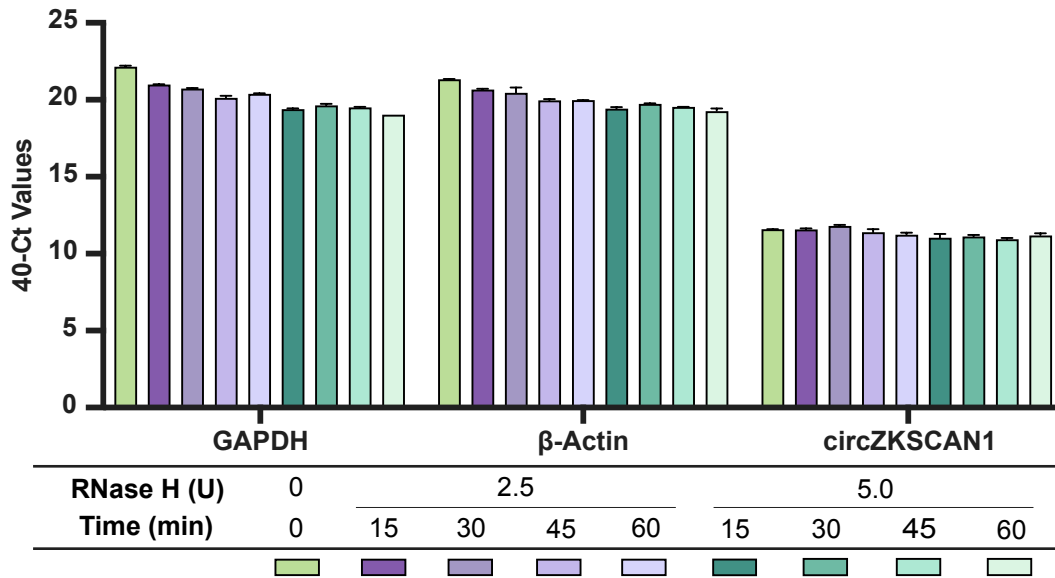

B

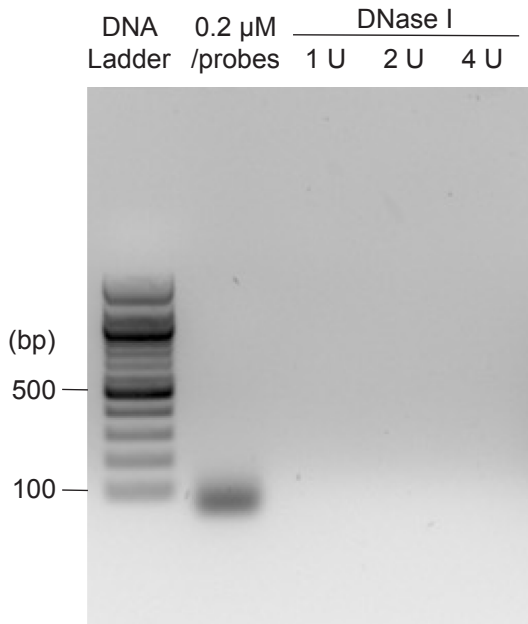

C

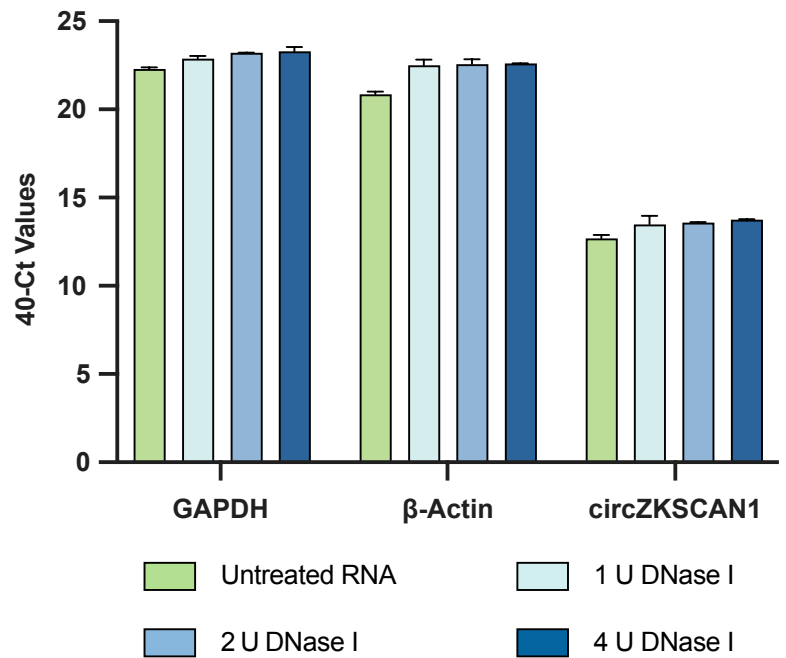

**Supplemental Figure 1.** Optimization of rRRR for removal of excess of probes and efficient rRNA depletion.

- A) Total HeLa RNA was incubated with 0, 2.5, or 5.0 U of RNase H for 0, 15, 30, 45, or 60 minutes. RT-qPCR of the RNA after the incubations showed the effects of the enzyme on non-rRNAs (GAPDH,  $\beta$ -Actin, and circZKSCAN1) to determine an optimal condition that does not cause unwanted degradation of non-rRNA genes.
- B) 0.2  $\mu$ M probes were incubated with increasing units of DNase I to find optimum unit needed for removing the probes.
- C) RT-qPCR of GAPDH,  $\beta$ -Actin, and cZKSCAN1 after treatment with 1 U, 2 U, or 4 U of DNase I (Mean of n = 3 technical replicates with SEM).

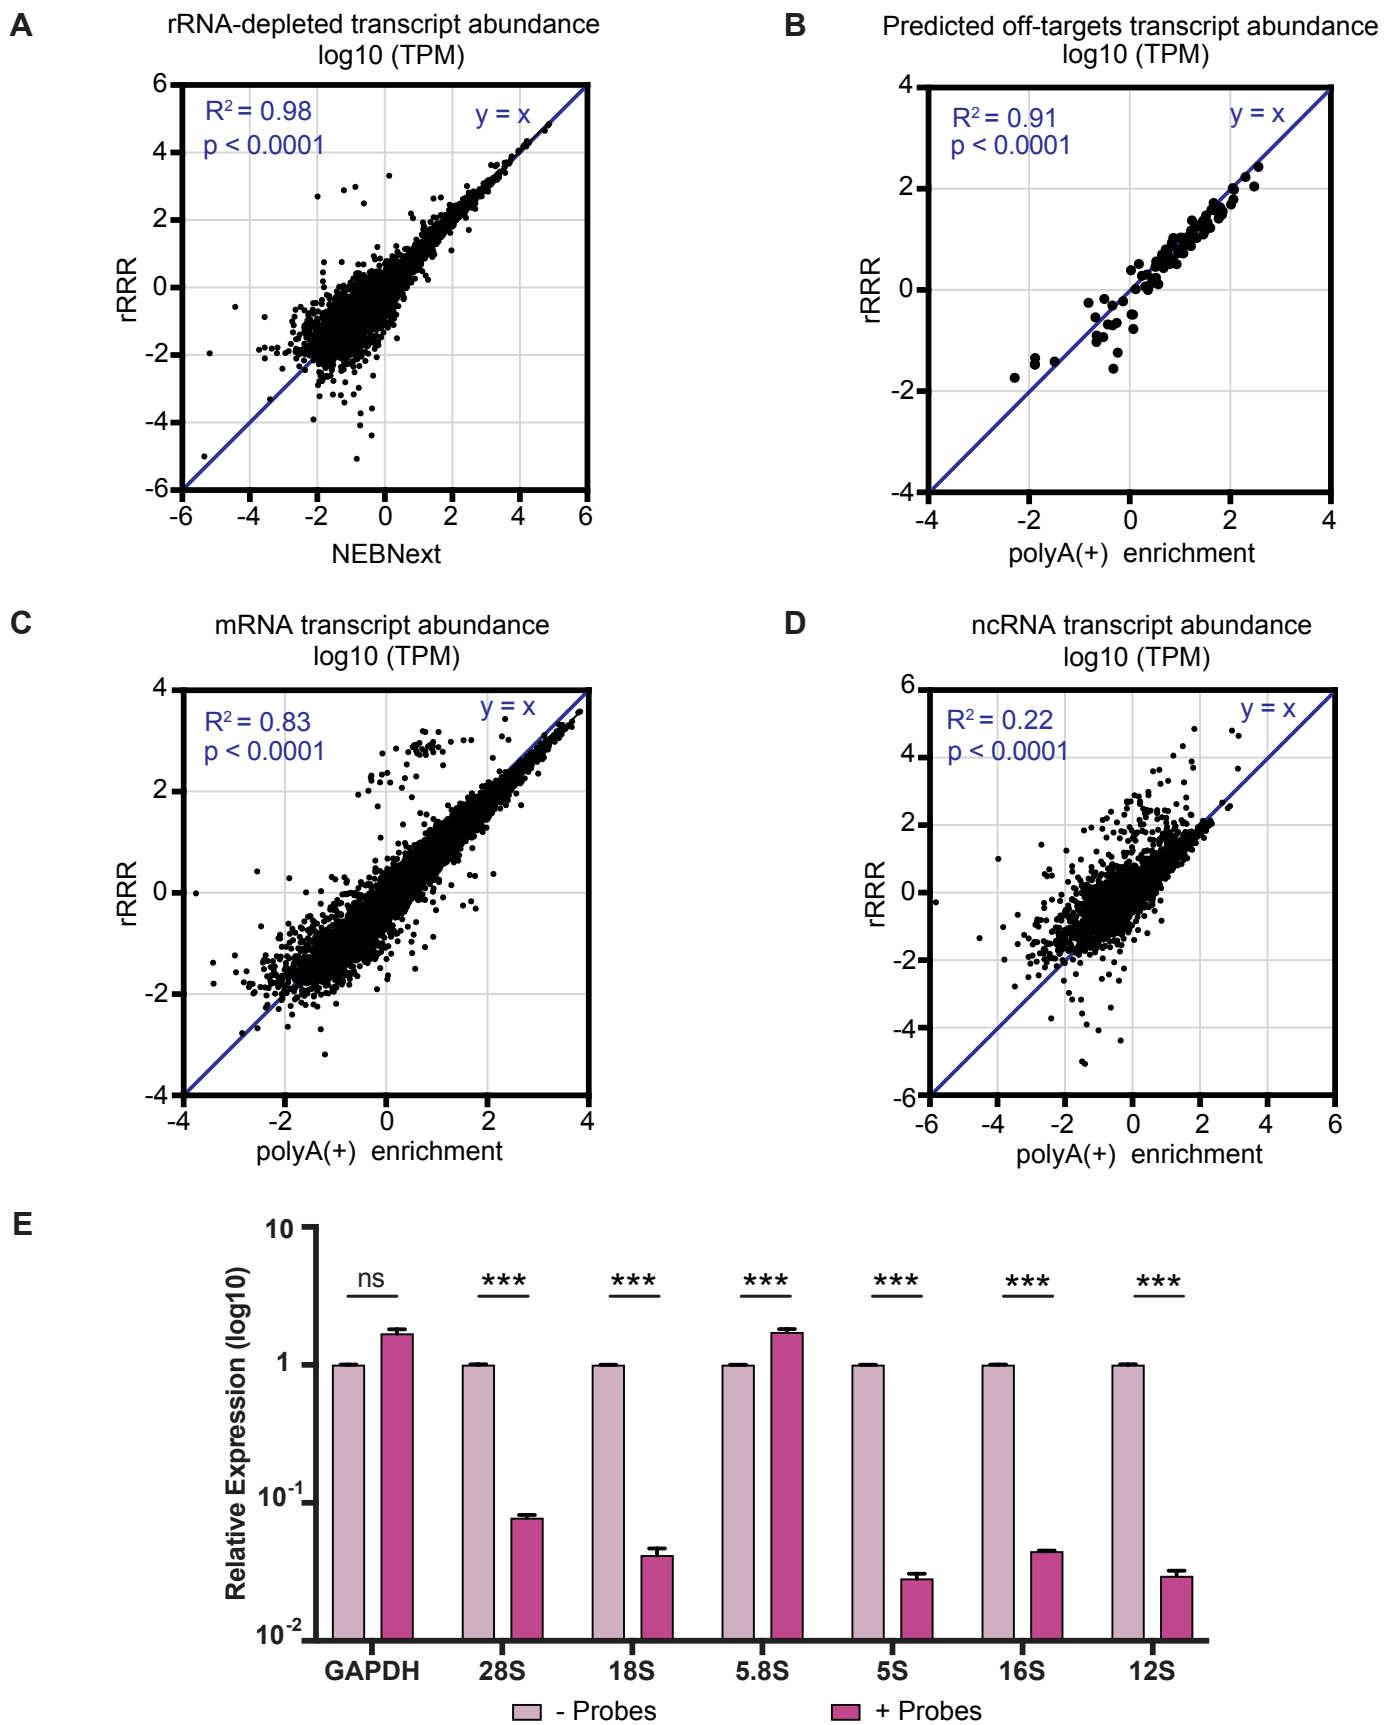

**Supplemental Figure 2.** rRRR in comparison to other commercial methods.

A) Analysis of rRNA-depleted RNA transcripts between rRRR and NEBNext treated RNA depicted  $R^2 = 0.98$ .

B) Predicted off-targets transcripts between rRRR treated RNA and polyA RNA had  $R^2 = 0.91$ .

C) Scatter plots for mRNA and (D) ncRNA between rRRR-treated RNA and polyA(+) RNA showed  $R^2 = 0.83$  and  $0.22$  respectively. RNA-seq was performed in duplicate. TPM: Transcripts Per Million,  $R^2$ : Coefficient of determination.

E) Relative expression of transcripts in “- Probes” and “+ Probes” from HeLa RNA depleted for rRNAs using RiboMinus Kit. Representative data is shown as mean of  $n = 3$  biological replicates with SEM.

ns:  $p > 0.05$ , \* :  $p \leq 0.05$ , \*\* :  $p \leq 0.01$ , \*\*\* :  $p \leq 0.001$  (unpaired t-test).

## A. Probes Hybridization

| RNA Amount       | Volume ( $\mu\text{L}$ ) | 46.6 $\mu\text{M}$ Probes ( $\mu\text{L}$ ) | 1M Tris-Cl (pH 7.4) ( $\mu\text{L}$ ) | 5M NaCl ( $\mu\text{L}$ ) | H <sub>2</sub> O       |
|------------------|--------------------------|---------------------------------------------|---------------------------------------|---------------------------|------------------------|
| 1 $\mu\text{g}$  | x                        | 2.0                                         | 1.0                                   | 0.4                       | up to 10 $\mu\text{L}$ |
| 10 $\mu\text{g}$ | x                        | 20.0                                        | 3.0                                   | 1.2                       | up to 30 $\mu\text{L}$ |
| 20 $\mu\text{g}$ | x                        | 40.0                                        | 6.0                                   | 2.4                       | up to 60 $\mu\text{L}$ |

Incubation: 95 °C for 2 minutes, TD from 95 °C to 22 °C 0.1C/sec, and hold at 22 °C for 5 minutes

## B. RNase H Reaction

| RNA Amount       | Vol. From Previous Reaction ( $\mu\text{L}$ ) | RNase H ( $\mu\text{L}$ ) | 10X RNase H Buffer ( $\mu\text{L}$ ) | H <sub>2</sub> O       |
|------------------|-----------------------------------------------|---------------------------|--------------------------------------|------------------------|
| 1 $\mu\text{g}$  | 10.0                                          | 0.5                       | 1.5                                  | up to 15 $\mu\text{L}$ |
| 10 $\mu\text{g}$ | 30.0                                          | 5.0                       | 4.0                                  | up to 40 $\mu\text{L}$ |
| 20 $\mu\text{g}$ | 60.0                                          | 10.0                      | 8.0                                  | up to 80 $\mu\text{L}$ |

Incubation: 37 °C for 30 minutes

## C. DNase I Reaction

| RNA Amount       | Vol. From Previous Reaction ( $\mu\text{L}$ ) | DNase I ( $\mu\text{L}$ ) | 10X DNase I Buffer ( $\mu\text{L}$ ) | H <sub>2</sub> O        |
|------------------|-----------------------------------------------|---------------------------|--------------------------------------|-------------------------|
| 1 $\mu\text{g}$  | 15.0                                          | 1.0                       | 2.0                                  | up to 20 $\mu\text{L}$  |
| 10 $\mu\text{g}$ | 40.0                                          | 10.0                      | 6.0                                  | up to 60 $\mu\text{L}$  |
| 20 $\mu\text{g}$ | 80.0                                          | 20.0                      | 12.0                                 | up to 120 $\mu\text{L}$ |

Incubation: 37 °C for 30 minutes

## D. Bead Purification

| RNA Amount       | Volume of Previous Reaction | Beads ( $\mu\text{L}$ ) |
|------------------|-----------------------------|-------------------------|
| 1 $\mu\text{g}$  | 20.0                        | 36.0                    |
| 10 $\mu\text{g}$ | 60.0                        | 108.0                   |
| 20 $\mu\text{g}$ | 110.0                       | 198.0                   |

Followed manufacturer's protocol

**Supplemental Figure 3.** Reactions volumes used for rRNA depletions with 1  $\mu\text{g}$ , 10  $\mu\text{g}$ , and 20  $\mu\text{g}$  of starting input RNA.

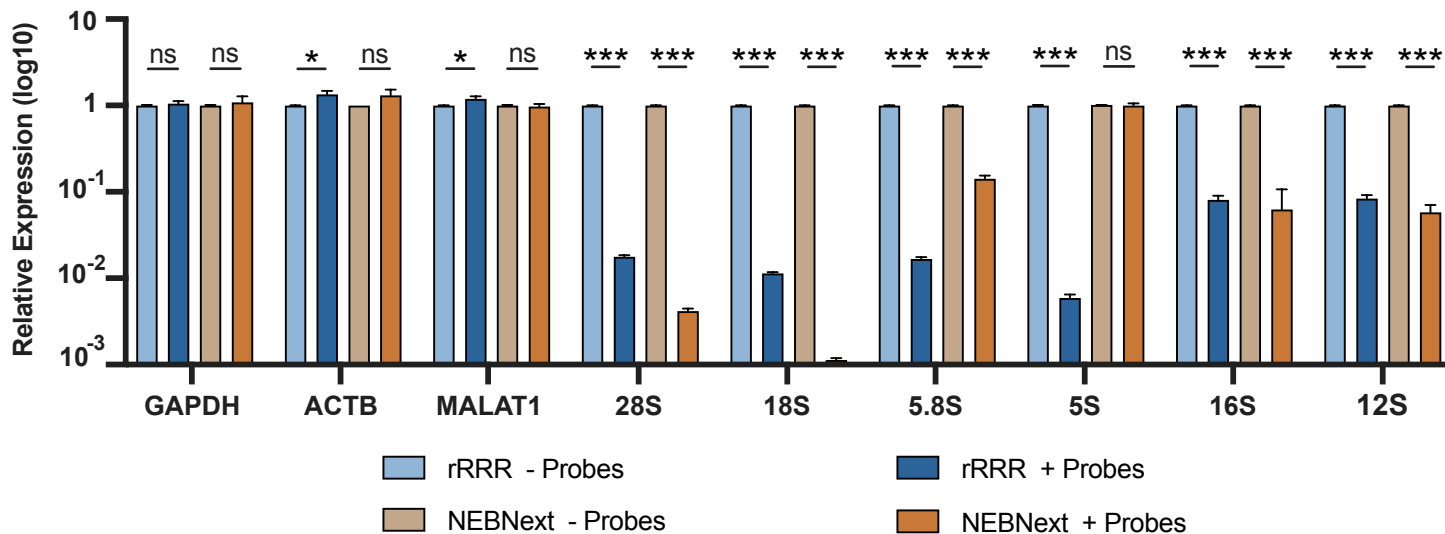

**Supplemental Figure 4.** Relative expression of transcripts in “- Probes” and “+ Probes” extracted from human lymph node FFPE cores was subjected to rRNA depletion using rRRR and NEBNext.

Representative data is shown as mean of n = 3 biological replicates with SEM.

ns:  $p > 0.05$ , \* :  $p \leq 0.05$ , \*\* :  $p \leq 0.01$ , \*\*\* :  $p \leq 0.001$  (unpaired t-test).

A

| Procedure              | Reagent                                                       | Catalog # | $\mu\text{L}$ per ug reaction | Cost per 1 $\mu\text{g}$ Reaction |
|------------------------|---------------------------------------------------------------|-----------|-------------------------------|-----------------------------------|
| <b>Baldwin et. al.</b> | 25 nmole DNA Oligo 50-mer (n = 195 probes), 100 $\mu\text{M}$ | Sigma     | 3.3                           | \$0.24                            |
|                        | Lucigen<br>Thermostable RNase H, 5 U/ $\mu\text{l}$           | H39500    | 2.0                           | \$8.84                            |
|                        | Turbo DNase, 2 U/ $\mu\text{l}$                               | AM2238    | 7.5                           | \$2.28                            |
|                        | Beckman Coulter Agencourt<br>RNAClean XP Beads                | A63987    | 176.0                         | \$4.00                            |
|                        | <b>Total Cost</b>                                             |           |                               | <b>\$15.40</b>                    |

B

| Procedure         | Reagent                                                     | Catalog # | $\mu\text{L}$ per ug reaction | Cost per 1 $\mu\text{g}$ Reaction |
|-------------------|-------------------------------------------------------------|-----------|-------------------------------|-----------------------------------|
| <b>RTR2D</b>      | 25 nmole DNA Oligo 35-mer (n = 30 probes), 50 $\mu\text{M}$ | Sigma     | 6.0                           | \$0.15                            |
|                   | NEB M-MuLV Reverse Transcriptase, 200 U/ $\mu\text{l}$      | M0253S    | 1.0                           | \$1.74                            |
|                   | NEB RNase Inhibitor, 2 U/ $\mu\text{l}$                     | M0314S    | 2.0                           | \$0.45                            |
|                   | NEB Exonuclease I, 2 U/ $\mu\text{l}$                       | M0293S    | 2.0                           | \$2.16                            |
|                   | NEB RNase H, 2 U/ $\mu\text{l}$                             | M0297S    | 2.0                           | \$1.05                            |
|                   | NEB DNase I, 2 U/ $\mu\text{l}$                             | M0303S    | 2.0                           | \$3.28                            |
|                   | NEB dNTPs, 10 mM                                            | N0447S    | 2.0                           | \$0.31                            |
|                   | Thermo Phenol Chloroform based purifications                | 15593031  | 600                           | \$1.00                            |
| <b>Total Cost</b> |                                                             |           | <b>\$10.14</b>                |                                   |

**Supplemental Figure 5.** Cost breakdown of other non-commercial RNase-H based rRNA depletion methods

A) Cost of reagents for RNase H based rRNA depletion method by Baldwin et. al. (9) was calculated. The cost for depleting rRNAs from 1  $\mu\text{g}$  of total RNA amounted to \$15.4.

B) Cost calculations of RTR2D (10), totaled to \$10.14 for depleting rRNAs from 1  $\mu\text{g}$  of total RNA.
