# Supplementary material
Source: HighWire-hosted journal article supplement (doi:10.1101/rna.079761.123)
Supplement: Supplemental_Table_1.xlsx [file Supplemental_Table_1.xlsx]

## Sheet: 28s rRNA probes
Target Ribosomal RNA: 28s rRNA	Desiged using	Probe Sequence	Length
NR_003287.4 Homo sapie:28-78	NEBNext Custom Depletion Tool	ATCCTGGTTAGTTTCTTCTCCTCCGCTGACTAATATGCTTAAATTCAGCG	50
NR_003287.4 Homo sapie:58-103	NEBNext Custom Depletion Tool	CTGTTCACTCGCCGTTACTGAGGGAATCCTGGTTAGTTTCTTCTC	45
NR_003287.4 Homo sapie:180-236	NEBNext Custom Depletion Tool	TCACACCGTCCACGGGCTGGGCCTCGATCAGAAGGACTTGGGCCCCCCACGAGCGG	56
NR_003287.4 Homo sapie:251-302	NEBNext Custom Depletion Tool	CTGCATTCCCAAGCAACCCGACTCCGGGAAGACCCGGGCCCGGCGCGCCGG	51
NR_003287.4 Homo sapie:283-339	NEBNext Custom Depletion Tool	TATTTAGCCTTAGATGGAGTTTACCACCCGCTTTGGGCTGCATTCCCAAGCAACCC	56
NR_003287.4 Homo sapie:315-365	NEBNext Custom Depletion Tool	CTTGTTGACTATCGGTCTCGTGCCGGTATTTAGCCTTAGATGGAGTTTAC	50
NR_003287.4 Homo sapie:347-397	NEBNext Custom Depletion Tool	TTCAAAGTTCTTTTCAACTTTCCCTTACGGTACTTGTTGACTATCGGTCT	50
NR_003287.4 Homo sapie:384-434	NEBNext Custom Depletion Tool	TACCTCTTAACGGTTTCACGCCCTCTTGAACTCTCTCTTCAAAGTTCTTT	50
NR_003287.4 Homo sapie:415-456	NEBNext Custom Depletion Tool	GACTGCGCGGACCCCACCCGTTTACCTCTTAACGGTTTCAC	41
NR_003287.4 Homo sapie:669-724	NEBNext Custom Depletion Tool	TCCCGGAGCCGGTCGCGGCGCACCGCCGCGGTGGAAATGCGCCCGGCGGCGGCCG	55
NR_003287.4 Homo sapie:731-777	NEBNext Custom Depletion Tool	GACGGACGGACGGGGCCCCCCGAGCCACCTTCCCCGCCGGGCCTTC	46
NR_003287.4 Homo sapie:879-919	NEBNext Custom Depletion Tool	CTGTAACACTCGGGGGGGGTTTCGGTCCCGCCGCCGCCGC	40
NR_003287.4 Homo sapie:911-968	NEBNext Custom Depletion Tool	GTCTCGCTCCCTCGGCCCCGGGATTCGGCGAGTGCTGCTGCCGGGGGGGCTGTAACA	57
NR_003287.4 Homo sapie:943-984	NEBNext Custom Depletion Tool	GAGAGCGCGGCGACGGGTCTCGCTCCCTCGGCCCCGGGATT	41
NR_003287.4 Homo sapie:1029-1069	NEBNext Custom Depletion Tool	CCCCCACGAGGAGACGCCGGCGCGCCCCCGCGGGGGAGAC	40
NR_003287.4 Homo sapie:1142-1194	NEBNext Custom Depletion Tool	GGGGCGCACTGGGGACAGTCCGCCCCGCCCCCCGACCCGCGCGCGGCACCCC	52
NR_003287.4 Homo sapie:1252-1305	NEBNext Custom Depletion Tool	GTAGCCGACGTCGCCGCCGACCCCGTGCGCTCGCTCCGCCGTCCCCCTCTTCG	53
NR_003287.4 Homo sapie:1284-1336	NEBNext Custom Depletion Tool	CTTGGTCCGTGTTTCAAGACGGGTCGGGTGGGTAGCCGACGTCGCCGCCGAC	52
NR_003287.4 Homo sapie:1316-1356	NEBNext Custom Depletion Tool	CTCGCGCACGTGTTAGACTCCTTGGTCCGTGTTTCAAGAC	40
NR_003287.4 Homo sapie:1361-1401	NEBNext Custom Depletion Tool	CCTTCACCTTCATTGCGCCACGGCGGCTTTCGTGCGAGCC	40
NR_003287.4 Homo sapie:1467-1521	NEBNext Custom Depletion Tool	GGTCCTAACACGTGCGCTCGTGCTCCACCTCCCCGGCGCGGCGGGCGAGACGGG	54
NR_003287.4 Homo sapie:1499-1540	NEBNext Custom Depletion Tool	CATAGTTCACCATCTTTCGGGTCCTAACACGTGCGCTCGTG	41
NR_003287.4 Homo sapie:1546-1603	NEBNext Custom Depletion Tool	ATTTGCACGTCAGGACCGCTACGGACCTCCACCAGAGTTTCCTCTGGCTTCGCCCTG	57
NR_003287.4 Homo sapie:1585-1625	NEBNext Custom Depletion Tool	CTATACCCAGGTCGGACGACCGATTTGCACGTCAGGACCG	40
NR_003287.4 Homo sapie:1628-1675	NEBNext Custom Depletion Tool	GAAACTTCGGAGGGAACCAGCTACTAGATGGTTCGATTAGTCTTTCG	47
NR_003287.4 Homo sapie:1702-1756	NEBNext Custom Depletion Tool	GACCTCTAATCATTCGCTTTACCGGATAAAACTGCGTGGCGGGGGTGCGTCGGG	54
NR_003287.4 Homo sapie:1743-1794	NEBNext Custom Depletion Tool	TAAAGTTTGAGAATAGGTTGAGATCGTTTCGGCCCCAAGACCTCTAATCAT	51
NR_003287.4 Homo sapie:1774-1819	NEBNext Custom Depletion Tool	CAGCGAGCCGGGCTTCTTACCCATTTAAAGTTTGAGAATAGGTTG	45
NR_003287.4 Homo sapie:1804-1862	NEBNext Custom Depletion Tool	AAGTGGCCCACTAGGCACTCGCATTCCACGCCCGGCTCCACGCCAGCGAGCCGGGCTT	58
NR_003287.4 Homo sapie:1836-1878	NEBNext Custom Depletion Tool	CAGTTCTGCTTACCAAAAGTGGCCCACTAGGCACTCGCATTC	42
NR_003287.4 Homo sapie:1888-1944	NEBNext Custom Depletion Tool	TTTCTGGGGTCTGATGAGCGTCGGCATCGGGCGCCTTAACCCGGCGTTCGGTTCAT	56
NR_003287.4 Homo sapie:1922-1972	NEBNext Custom Depletion Tool	GTCCTGCTGTCTATATCAACCAACACCTTTTCTGGGGTCTGATGAGCGTC	50
NR_003287.4 Homo sapie:1953-1994	NEBNext Custom Depletion Tool	GATTCCGACTTCCATGGCCACCGTCCTGCTGTCTATATCAA	41
NR_003287.4 Homo sapie:1989-2035	NEBNext Custom Depletion Tool	CTAGTTGATTCGGCAGGTGAGTTGTTACACACTCCTTAGCGGATTC	46
NR_003287.4 Homo sapie:2024-2064	NEBNext Custom Depletion Tool	CGACGCTCCAGCGCCATCCATTTTCAGGGCTAGTTGATTC	40
NR_003287.4 Homo sapie:2259-2315	NEBNext Custom Depletion Tool	CTAGGCTTCAAGGCTCACCGCAGCGGCCCTCCTACTCGTCGCGGCGTAGCGTCCGC	56
NR_003287.4 Homo sapie:2293-2353	NEBNext Custom Depletion Tool	AGATCTGCACCTGCGGCGGCTCCACCCGGGCCCGCGCCCTAGGCTTCAAGGCTCACCGCA	60
NR_003287.4 Homo sapie:2327-2386	NEBNext Custom Depletion Tool	AAGTTCTCGTTTGAATATTTGCTACTACCACCAAGATCTGCACCTGCGGCGGCTCCACC	59
NR_003287.4 Homo sapie:2358-2408	NEBNext Custom Depletion Tool	CCCTTCTCCACTTCGGCCTTCAAAGTTCTCGTTTGAATATTTGCTACTAC	50
NR_003287.4 Homo sapie:2427-2470	NEBNext Custom Depletion Tool	GAACGGCGCTCGCCCATCTCTCAGGACCGACTGACCCATGTTC	43
NR_003287.4 Homo sapie:2459-2514	NEBNext Custom Depletion Tool	TTTCGATCGGCCGAGGGCAACGGAGGCCATCGCCCGTCCCTTCGGAACGGCGCTC	55
NR_003287.4 Homo sapie:2492-2532	NEBNext Custom Depletion Tool	GATCTGAACCCGACTCCCTTTCGATCGGCCGAGGGCAACG	40
NR_003287.4 Homo sapie:2536-2593	NEBNext Custom Depletion Tool	ATCGGTCGCGTTACCGCACTGGACGCCTCGCGGCGCCCATCTCCGCCACTCCGGATT	57
NR_003287.4 Homo sapie:2588-2639	NEBNext Custom Depletion Tool	CAAAGAAAAGAGAACTCTCCCCGGGGCTCCCGCCGGCTTCTCCGGGATCGG	51
NR_003287.4 Homo sapie:2620-2663	NEBNext Custom Depletion Tool	CATTCCAGGGCGCCCTGCCCTTCACAAAGAAAAGAGAACTCTC	43
NR_003287.4 Homo sapie:2656-2710	NEBNext Custom Depletion Tool	GAACCGCGACGCTTTCCAAGGCACGGGCCCCTCTCTCGGGGCGAACCCATTCCA	54
NR_003287.4 Homo sapie:2691-2747	NEBNext Custom Depletion Tool	TTTTCAAGGGCCAGCGAGAGCTCACCGGACGCCGCCGGAACCGCGACGCTTTCCAA	56
NR_003287.4 Homo sapie:2722-2771	NEBNext Custom Depletion Tool	GAGATTTACACCCTCTCCCCCGGATTTTCAAGGGCCAGCGAGAGCTCAC	49
NR_003287.4 Homo sapie:2761-2816	NEBNext Custom Depletion Tool	TGTTCACCTTGGAGACCTGCTGCGGATATGGGTACGGCCCGGCGCGAGATTTACA	55
NR_003287.4 Homo sapie:2800-2847	NEBNext Custom Depletion Tool	CTTACCTACATTGTTCCAACATGCCAGAGGCTGTTCACCTTGGAGAC	47
NR_003287.4 Homo sapie:2840-2889	NEBNext Custom Depletion Tool	CAATCCTTATCCCGAAGTTACGGATCCGGCTTGCCGACTTCCCTTACCT	49
NR_003287.4 Homo sapie:2871-2911	NEBNext Custom Depletion Tool	CGACCGACCCAGCCCTTAGAGCCAATCCTTATCCCGAAGT	40
NR_003287.4 Homo sapie:2904-2962	NEBNext Custom Depletion Tool	GGCGCCTCGTCCAGCCGCGGCGCGCGCCCAGCCCCGCTTCGCGCCCCAGCCCGACCGA	58
NR_003287.4 Homo sapie:3187-3234	NEBNext Custom Depletion Tool	CGCCGCCGGCCCCCCGGGTGCCCGGGCCCCCCTCGCGGGGGACCGTG	47
NR_003287.4 Homo sapie:3259-3299	NEBNext Custom Depletion Tool	CCGCGACGCCCGCCGCAGCTGGGGCGATCCACGGGAAGGG	40
NR_003287.4 Homo sapie:3323-3376	NEBNext Custom Depletion Tool	CCCAGCGGACGCGCGCGCGACGAGACGTGGGGTGGGGGGGGGGGCGCGCCGGC	53
NR_003287.4 Homo sapie:3572-3615	NEBNext Custom Depletion Tool	CAGTTCTAAGTCGGCTGCTAGGCGCCGGCCGAGGCGAGGCGCC	43
NR_003287.4 Homo sapie:3604-3654	NEBNext Custom Depletion Tool	TTTGTTTTAATTAAACAGTCGGATTCCCCTGGTCCGCACCAGTTCTAAGT	50
NR_003287.4 Homo sapie:3642-3698	NEBNext Custom Depletion Tool	AGAAATCACATCGCGTCAACACCCGCCGCGGGCCTTCGCGATGCTTTGTTTTAATT	56
NR_003287.4 Homo sapie:3684-3734	NEBNext Custom Depletion Tool	TTGAATTTCTTCACTTTGACATTCAGAGCACTGGGCAGAAATCACATCGC	50
NR_003287.4 Homo sapie:3715-3765	NEBNext Custom Depletion Tool	ATAGTTACTCCCGCCGTTTACCCGCGCTTCATTGAATTTCTTCACTTTGA	50
NR_003287.4 Homo sapie:3866-3921	NEBNext Custom Depletion Tool	AGCTCAACAGGGTCTTCTTTCCCCGCTGATTCCGCCAAGCCCGTTCCCTTGGCTG	55
NR_003287.4 Homo sapie:3901-3951	NEBNext Custom Depletion Tool	ATGTCTCTTCACCGTGCCAGACTAGAGTCAAGCTCAACAGGGTCTTCTTT	50
NR_003287.4 Homo sapie:3964-4007	NEBNext Custom Depletion Tool	CCCTCGCGGGGACACCGGGGGGGCGCCGGGGGCCTCCCACTTA	43
NR_003287.4 Homo sapie:4001-4051	NEBNext Custom Depletion Tool	TATTTCACCGGCGGCCCGCAGGGCCGGCGGACCCCGCCCCGGGCCCCTCG	50
NR_003287.4 Homo sapie:4033-4073	NEBNext Custom Depletion Tool	GAAAAAACGATCAGAGTAGTGGTATTTCACCGGCGGCCCG	40
NR_003287.4 Homo sapie:4063-4103	NEBNext Custom Depletion Tool	GGGCTCGCCCCCCCGCCTCACCGGGTCAGTGAAAAAACGA	40
NR_003287.4 Homo sapie:4136-4190	NEBNext Custom Depletion Tool	AACTCCCCACCTGGCACTGTCCCCGGAGCGGGTCGCGCCCGGCCGGCGCGCGGC	54
NR_003287.4 Homo sapie:4169-4225	NEBNext Custom Depletion Tool	TGCGTTACCGTTTGACAGGTGTACCGCCCCAGTCAAACTCCCCACCTGGCACTGTC	56
NR_003287.4 Homo sapie:4201-4241	NEBNext Custom Depletion Tool	CTCGCCTTAGGACACCTGCGTTACCGTTTGACAGGTGTAC	40
NR_003287.4 Homo sapie:4247-4303	NEBNext Custom Depletion Tool	AAAATCAAGATCAAGCGAGCTTTTGCCCTTCTGCTCCACGGGAGGTTTCTGTCCTC	56
NR_003287.4 Homo sapie:4279-4329	NEBNext Custom Depletion Tool	CGCTTTCACGGTCTGTATTCGTACTGAAAATCAAGATCAAGCGAGCTTTT	50
NR_003287.4 Homo sapie:4309-4363	NEBNext Custom Depletion Tool	TAAAACCCAAAAGGTCAGAAGGATCGTGAGGCCCCGCTTTCACGGTCTGTATTC	54
NR_003287.4 Homo sapie:4342-4392	NEBNext Custom Depletion Tool	CTGTGGTAACTTTTCTGACACCTCCTGCTTAAAACCCAAAAGGTCAGAAG	50
NR_003287.4 Homo sapie:4376-4426	NEBNext Custom Depletion Tool	CTATGAACGCTTGGCCGCCACAAGCCAGTTATCCCTGTGGTAACTTTTCT	50
NR_003287.4 Homo sapie:4419-4475	NEBNext Custom Depletion Tool	TTCACAATGATAGGAAGAGCCGACATCGAAGGATCAAAAAGCGACGTCGCTATGAA	56
NR_003287.4 Homo sapie:4456-4506	NEBNext Custom Depletion Tool	GGTGAACAATCCAACGCTTGGTGAATTCTGCTTCACAATGATAGGAAGAG	50
NR_003287.4 Homo sapie:4486-4536	NEBNext Custom Depletion Tool	TCTAAACCCAGCTCACGTTCCCTATTAGTGGGTGAACAATCCAACGCTTG	50
NR_003287.4 Homo sapie:4529-4579	NEBNext Custom Depletion Tool	CAACACATCATCAGTAGGGTAAAACTAACCTGTCTCACGACGGTCTAAAC	50
NR_003287.4 Homo sapie:4562-4612	NEBNext Custom Depletion Tool	TTCCTCTCGTACTGAGCAGGATTACCATGGCAACAACACATCATCAGTAG	50
NR_003287.4 Homo sapie:4663-4712	NEBNext Custom Depletion Tool	GGATTCTGACTTAGAGGCGTTCAGTCATAATCCCACAGATGGTAGCTTC	49
NR_003287.4 Homo sapie:4696-4736	NEBNext Custom Depletion Tool	CTGCCGTATCGTTCCGCCTGGGCGGGATTCTGACTTAGAG	40
NR_003287.4 Homo sapie:4805-4860	NEBNext Custom Depletion Tool	GGTCCCGGCGCGCGGCGGGGCACGCGCCCTCCCGCGCGCGCGGGGCGCGTGGAGG	55
NR_003287.4 Homo sapie:4837-4890	NEBNext Custom Depletion Tool	CAGGACGAAGGGCACTCCGCACCGGACCCCGGTCCCGGCGCGCGGCGGGGCAC	53
NR_003287.4 Homo sapie:4904-4958	NEBNext Custom Depletion Tool	GTTCCCCACGAACGTGCGGTGCGTGACGGGCGAGGGGGCGGCCGCCTCTCCGGC	54
NR_003287.4 Homo sapie:4937-4992	NEBNext Custom Depletion Tool	AGAAGCAGGTCGTCTACGAATGGTTTAGCGCCAGGTTCCCCACGAACGTGCGGTG	55
NR_003287.4 Homo sapie:4968-5018	NEBNext Custom Depletion Tool	CTCTGCTACGTACGAAACCCCGACCCAGAAGCAGGTCGTCTACGAATGGT	50
NR_003287.4 Homo sapie:5000-5050	NEBNext Custom Depletion Tool	CTGACTTTCAATAGATCGCAGCGAGGGAGCTGCTCTGCTACGTACGAAAC	50
NR_003287.4 Homo sapie:456-475	Stellaris Probe Designer	CGGGTTGAATCCTCCGGGCG	20
NR_003287.4 Homo sapie:480-499	Stellaris Probe Designer	CGCCGACACGGCCGGACCCG	20
NR_003287.4 Homo sapie:502-521	Stellaris Probe Designer	GGGCGGGAAAGATCCGCCGG	20
NR_003287.4 Homo sapie:508-527	Stellaris Probe Designer	AACGGGGGGCGGGAAAGATC	20
NR_003287.4 Homo sapie:524-543	Stellaris Probe Designer	TGGAGGGGTCGGGAGGAACG	20
NR_003287.4 Homo sapie:546-565	Stellaris Probe Designer	CGGCGGGGGAAGGGAGGGCG	20
NR_003287.4 Homo sapie:568-587	Stellaris Probe Designer	CTCCGGGGAGGAGGAGGAGG	20
NR_003287.4 Homo sapie:596-615	Stellaris Probe Designer	CACCCCCGCACCCGCCGGAG	20
NR_003287.4 Homo sapie:648-667	Stellaris Probe Designer	TCGCCGGTCGGGGGACGGTC	20
NR_003287.4 Homo sapie:1670-1689	Stellaris Probe Designer	CCAGCTATCCTGAGGGAAAC	20
NR_003287.4 Homo sapie:2065-2084	Stellaris Probe Designer	GGCGACGGCCGGGTATGGGC	20
NR_003287.4 Homo sapie:2087-2106	Stellaris Probe Designer	CTCCCGTCCACTCTCGACTG	20
NR_003287.4 Homo sapie:2131-2150	Stellaris Probe Designer	TCCGACGCACACCACACGCG	20
NR_003287.4 Homo sapie:2172-2191	Stellaris Probe Designer	GGAAGGACCCCACACCCCCG	20
NR_003287.4 Homo sapie:2194-2213	Stellaris Probe Designer	GAGGCGTGGGGGGGGGGGCG	20
NR_003287.4 Homo sapie:2216-2235	Stellaris Probe Designer	GGCGTGGGCGGGAGGAGGGG	20
NR_003287.4 Homo sapie:2238-2257	Stellaris Probe Designer	GGGCTCCGGGGGCGGGGAGC	20
NR_003287.4 Homo sapie:2973-2992	Stellaris Probe Designer	AGGGGGGTGCCCCGGGCGTG	20
NR_003287.4 Homo sapie:2998-3017	Stellaris Probe Designer	CGGGGTGGGGCGGGGGAGGG	20
NR_003287.4 Homo sapie:3027-3046	Stellaris Probe Designer	CGGGGCGGGGAGGGAGCGAG	20
NR_003287.4 Homo sapie:3047-3066	Stellaris Probe Designer	AGAGAGAGAGAGAGAGGGCG	20
NR_003287.4 Homo sapie:3049-3068	Stellaris Probe Designer	GGAGAGAGAGAGAGAGAGGG	20
NR_003287.4 Homo sapie:3073-3092	Stellaris Probe Designer	GGAGGGGGGAGGACGGGGAG	20
NR_003287.4 Homo sapie:3127-3146	Stellaris Probe Designer	CTGCCGCCCCGACCCTTCTC	20
NR_003287.4 Homo sapie:3425-3444	Stellaris Probe Designer	GGTAGGGCGGGGGGACGAAC	20
NR_003287.4 Homo sapie:3452-3471	Stellaris Probe Designer	GGAACGGGGGGCGGACGGGG	20
NR_003287.4 Homo sapie:3475-3494	Stellaris Probe Designer	CGCCGCGCGCCGAGGAGGAG	20
NR_003287.4 Homo sapie: 3530-3549	Stellaris Probe Designer	GCGGACCCGGCGGGGGGGAC	20
NR_003287.4 Homo sapie:3763-3782	Stellaris Probe Designer	GGCTACCTTAAGAGAGTCAT	20
NR_003287.4 Homo sapie:3843-3862	Stellaris Probe Designer	TTTCGCTGGATAGTAGGTAG	20
NR_003287.4 Homo sapie:3946-3965	Stellaris Probe Designer	TATTCTACACCTCTCATGTC	20
NR_003287.4 Homo sapie:4610-4629	Stellaris Probe Designer	AAATGTCTGAACCTGCGGTT	20
NR_003287.4 Homo sapie:5038-5057	Stellaris Probe Designer	GTCGAGGGCTGACTTTCAAT	20

## Sheet: 18s rRNA probes
Target Ribosomal RNA: 18s rRNA	Designed Using	Probe Sequence	Length
NR_003286.4 Homo sapie:17-67	NEBNext Custom Depletion Tool	CGTACTCAGACATGCATGGCTTAATCTTTGAGACAAGCATATGCTACTGG	50
NR_003286.4 Homo sapie:57-113	NEBNext Custom Depletion Tool	ATAACTGATTTAATGAGCCATTCGCAGTTTCACTGTACCGGCCGTGCGTACTCAGA	56
NR_003286.4 Homo sapie:100-150	NEBNext Custom Depletion Tool	TATCCAAGTAGGAGAGGAGCGAGCGACCAAAGGAACCATAACTGATTTAA	50
NR_003286.4 Homo sapie:141-186	NEBNext Custom Depletion Tool	CCCGTCGGCATGTATTAGCTCTAGAATTACCACAGTTATCCAAGT	45
NR_003286.4 Homo sapie:171-231	NEBNext Custom Depletion Tool	TTGATCTGATAAATGCACGCATCCCCCCCGCGAAGGGGGTCAGCGCCCGTCGGCATGTAT	60
NR_003286.4 Homo sapie:206-246	NEBNext Custom Depletion Tool	CTGACCGGGTTGGTTTTGATCTGATAAATGCACGCATCCC	40
NR_003286.4 Homo sapie:249-302	NEBNext Custom Depletion Tool	TATCTAGAGTCACCAAAGCCGCCGGCGCCCGCCCCCCGGCCGGGGCCGGAGAG	53
NR_003286.4 Homo sapie:281-321	NEBNext Custom Depletion Tool	CGTGCGATCGGCCCGAGGTTATCTAGAGTCACCAAAGCCG	40
NR_003286.4 Homo sapie:325-379	NEBNext Custom Depletion Tool	ACTACCATCGAAAGTTGATAGGGCAGACGTTCGAATGGGTCGTCGCCGCCACGG	54
NR_003286.4 Homo sapie:396-451	NEBNext Custom Depletion Tool	GTTTCTCAGGCTCCCTCTCCGGAATCGAACCCTGATTCCCCGTCACCCGTGGTCA	55
NR_003286.4 Homo sapie:483-533	NEBNext Custom Depletion Tool	GTATTGTTATTTTTCGTCACTACCTCCCCGGGTCGGGAGTGGGTAATTTG	50
NR_003286.4 Homo sapie:521-571	NEBNext Custom Depletion Tool	GTGGACTCATTCCAATTACAGGGCCTCGAAAGAGTCCTGTATTGTTATTT	50
NR_003286.4 Homo sapie:554-604	NEBNext Custom Depletion Tool	GCCCTCCAATGGATCCTCGTTAAAGGATTTAAAGTGGACTCATTCCAATT	50
NR_003286.4 Homo sapie:587-644	NEBNext Custom Depletion Tool	TATTGGAGCTGGAATTACCGCGGCTGCTGGCACCAGACTTGCCCTCCAATGGATCCT	57
NR_003286.4 Homo sapie:621-671	NEBNext Custom Depletion Tool	TTTAACTGCAGCAACTTTAATATACGCTATTGGAGCTGGAATTACCGCGG	50
NR_003286.4 Homo sapie:651-697	NEBNext Custom Depletion Tool	CGCTCCCAAGATCCAACTACGAGCTTTTTAACTGCAGCAACTTTAA	46
NR_003286.4 Homo sapie:681-736	NEBNext Custom Depletion Tool	GGGACGGGCGGTGGCTCGCCTCGCGGCGGACCGCCCGCCCGCTCCCAAGATCCAA	55
NR_003286.4 Homo sapie:725-782	NEBNext Custom Depletion Tool	GACACTCAGCTAAGAGCATCGAGGGGGCGCCGAGAGGCAAGGGGCGGGGACGGGCGG	57
NR_003286.4 Homo sapie:760-815	NEBNext Custom Depletion Tool	ATTTTTTCAAAGTAAACGCTTCGGGCCCCGCGGGACACTCAGCTAAGAGCATCGA	55
NR_003286.4 Homo sapie:794-848	NEBNext Custom Depletion Tool	TCCAGGCGGCTCGGGCCTGCTTTGAACACTCTAATTTTTTCAAAGTAAACGCTT	54
NR_003286.4 Homo sapie:825-874	NEBNext Custom Depletion Tool	CTATTCCATTATTCCTAGCTGCGGTATCCAGGCGGCTCGGGCCTGCTTT	49
NR_003286.4 Homo sapie:859-909	NEBNext Custom Depletion Tool	TCAGTTCCGAAAACCAACAAAATAGAACCGCGGTCCTATTCCATTATTCC	50
NR_003286.4 Homo sapie:937-977	NEBNext Custom Depletion Tool	CCGGTCCAAGAATTTCACCTCTAGCGGCGCAATACGAATG	40
NR_003286.4 Homo sapie:979-1029	NEBNext Custom Depletion Tool	TTGATTAATGAAAACATTCTTGGCAAATGCTTTCGCTCTGGTCCGTCTTG	50
NR_003286.4 Homo sapie:1016-1066	NEBNext Custom Depletion Tool	CGGTATCTGATCGTCTTCGAACCTCCGACTTTCGTTCTTGATTAATGAAA	50
NR_003286.4 Homo sapie:1095-1150	NEBNext Custom Depletion Tool	TTGGTTTCCCGGAAGCTGCCCGGCGGGTCATGGGAATAACGCCGCCGCATCGCCG	55
NR_003286.4 Homo sapie:1199-1254	NEBNext Custom Depletion Tool	TGTTGAGTCAAATTAAGCCGCAGGCTCCACTCCTGGTGGTGCCCTTCCGTCAATT	55
NR_003286.4 Homo sapie:1237-1277	NEBNext Custom Depletion Tool	TCCGGGCCGGGTGAGGTTTCCCGTGTTGAGTCAAATTAAG	40
NR_003286.4 Homo sapie:1275-1321	NEBNext Custom Depletion Tool	CACGGAATCGAGAAAGAGCTATCAATCTGTCAATCCTGTCCGTGTC	46
NR_003286.4 Homo sapie:1306-1363	NEBNext Custom Depletion Tool	ACAAATCGCTCCACCAACTAAGAACGGCCATGCACCACCACCCACGGAATCGAGAAA	57
NR_003286.4 Homo sapie:1339-1389	NEBNext Custom Depletion Tool	TCTCGTTCGTTATCGGAATTAACCAGACAAATCGCTCCACCAACTAAGAA	50
NR_003286.4 Homo sapie:1420-1467	NEBNext Custom Depletion Tool	CTGAACGCCACTTGTCCCTCTAAGAAGTTGGGGGACGCCGACCGCTC	47
NR_003286.4 Homo sapie:1454-1510	NEBNext Custom Depletion Tool	ATCTAAGGGCATCACAGACCTGTTATTGCTCAATCTCGGGTGGCTGAACGCCACTT	56
NR_003286.4 Homo sapie:1486-1546	NEBNext Custom Depletion Tool	TGAGCCAGTCAGTGTAGCGCGCGTGCAGCCCCGGACATCTAAGGGCATCACAGACCTGTT	60
NR_003286.4 Homo sapie:1598-1654	NEBNext Custom Depletion Tool	ACTTACTGGGAATTCCTCGTTCATGGGGAATAATTGCAATCCCCGATCCCCATCAC	56
NR_003286.4 Homo sapie:1630-1680	NEBNext Custom Depletion Tool	TTAATCAACGCAAGCTTATGACCCGCACTTACTGGGAATTCCTCGTTCAT	50
NR_003286.4 Homo sapie:1748-1802	NEBNext Custom Depletion Tool	TTCGACCGTCTTCTCAGCGCTCCGCCAGGGCCGTGGGCCGACCCCGGCGGGGCC	54
NR_003286.4 Homo sapie:1780-1829	NEBNext Custom Depletion Tool	GACTTTTACTTCCTCTAGATAGTCAAGTTCGACCGTCTTCTCAGCGCTC	49
NR_003286.4 Homo sapie:1819-1869	NEBNext Custom Depletion Tool	AATGATCCTTCCGCAGGTTCACCTACGGAAACCTTGTTACGACTTTTACT	50

## Sheet: 16s rRNA probes
Target Ribosomal RNA: 16s rRNA	Designed Using	Probe Sequence	Length
NC_012920.1:1671-3229 :21-71	NEBNext Custom Depletion Tool	TTATTTGGGTAAATGGTTTGGCTAAGGTTGTCTGGTAGTAAGGTGGAGTG	50
NC_012920.1:1671-3229 :54-104	NEBNext Custom Depletion Tool	TTGCGCCAGGTTTCAATTTCTATCGCCTATACTTTATTTGGGTAAATGGT	50
NC_012920.1:1671-3229 :88-135	NEBNext Custom Depletion Tool	TTTTCATCTTTCCCTTGCGGTACTATATCTATTGCGCCAGGTTTCAA	47
NC_012920.1:1671-3229 :140-190	NEBNext Custom Depletion Tool	TCATTATGCAGAAGGTATAGGGGTTAGTCCTTGCTATATTATGCTTGGTT	50
NC_012920.1:1671-3229 :185-235	NEBNext Custom Depletion Tool	GGGGTCTTAGCTTTGGCTCTCCTTGCAAAGTTATTTCTAGTTAATTCATT	50
NC_012920.1:1671-3229 :219-272	NEBNext Custom Depletion Tool	CTCTTTTAGCTGTTCTTAGGTAGCTCGTCTGGTTTCGGGGGTCTTAGCTTTGG	53
NC_012920.1:1671-3229 :250-300	NEBNext Custom Depletion Tool	CCACTATTTTGCTACATAGACGGGTGTGCTCTTTTAGCTGTTCTTAGGTA	50
NC_012920.1:1671-3229 :284-334	NEBNext Custom Depletion Tool	TCGGTAGGTTTGTCGCCTCTACCTATAAATCTTCCCACTATTTTGCTACA	50
NC_012920.1:1671-3229 :315-370	NEBNext Custom Depletion Tool	TAAGATTCTATCTTGGACAACCAGCTATCACCAGGCTCGGTAGGTTTGTCGCCTC	55
NC_012920.1:1671-3229 :348-398	NEBNext Custom Depletion Tool	GGTTCTGTGGGCAAATTTAAAGTTGAACTAAGATTCTATCTTGGACAACC	50
NC_012920.1:1671-3229 :391-443	NEBNext Custom Depletion Tool	TGTTCCTCTTTGGACTAACAGTTAAATTTACAAGGGGATTTAGAGGGTTCTG	52
NC_012920.1:1671-3229 :422-464	NEBNext Custom Depletion Tool	TTTTCCTAGTGTCCAAAGAGCTGTTCCTCTTTGGACTAACAG	42
NC_012920.1:1671-3229 :464-517	NEBNext Custom Depletion Tool	GCTGCTTTTAGGCCTACTATGGGTGTTAAATTTTTTACTCTCTCTACAAGGTT	53
NC_012920.1:1671-3229 :496-546	NEBNext Custom Depletion Tool	GTTGAGCTTGAACGCTTTCTTAATTGGTGGCTGCTTTTAGGCCTACTATG	50
NC_012920.1:1671-3229 :526-566	NEBNext Custom Depletion Tool	GGATTTTTTAGGTAGTGGGTGTTGAGCTTGAACGCTTTCT	40
NC_012920.1:1671-3229 :564-614	NEBNext Custom Depletion Tool	GGTGATAGATTGGTCCAATTGGGTGTGAGGAGTTCAGTTATATGTTTGGG	50
NC_012920.1:1671-3229 :609-665	NEBNext Custom Depletion Tool	GCGGAGGAGAATGTTTTCATGTTACTTATACTAACATTAGTTCTTCTATAGGGTGA	56
NC_012920.1:1671-3229 :641-691	NEBNext Custom Depletion Tool	AGTGTTTTAATCTGACGCAGGCTTATGCGGAGGAGAATGTTTTCATGTTA	50
NC_012920.1:1671-3229 :671-721	NEBNext Custom Depletion Tool	TGTAGATATTGGGCTGTTAATTGTCAGTTCAGTGTTTTAATCTGACGCAG	50
NC_012920.1:1671-3229 :704-754	NEBNext Custom Depletion Tool	GACAGTGAGGGTAATAATGACTTGTTGGTTGATTGTAGATATTGGGCTGT	50
NC_012920.1:1671-3229 :741-791	NEBNext Custom Depletion Tool	TTTTAACCTTTCCTTATGAGCATGCCTGTGTTGGGTTGACAGTGAGGGTA	50
NC_012920.1:1671-3229 :772-821	NEBNext Custom Depletion Tool	GGGTAAGATTTGCCGAGTTCCTTTTACTTTTTTTAACCTTTCCTTATGA	49
NC_012920.1:1671-3229 :818-867	NEBNext Custom Depletion Tool	CTCTAATACTGGTGATGCTAGAGGTGATGTTTTTGGTAAACAGGCGGGG	49
NC_012920.1:1671-3229 :850-897	NEBNext Custom Depletion Tool	GTTAAACATGTGTCACTGGGCAGGCGGTGCCTCTAATACTGGTGATG	47
NC_012920.1:1671-3229 :888-941	NEBNext Custom Depletion Tool	AACAAGTGATTATGCTACCTTTGCACGGTTAGGGTACCGCGGCCGTTAAACAT	53
NC_012920.1:1671-3229 :921-971	NEBNext Custom Depletion Tool	GGAGCCATTCATACAGGTCCCTATTTAAGGAACAAGTGATTATGCTACCT	50
NC_012920.1:1671-3229 :952-1001	NEBNext Custom Depletion Tool	GTTAAAAGTAAGAGACAGCTGAACCCTCGTGGAGCCATTCATACAGGTC	49
NC_012920.1:1671-3229 :992-1048	NEBNext Custom Depletion Tool	TCTTGCTGTGTTATGCCCGCCTCTTCACGGGCAGGTCAATTTCACTGGTTAAAAGT	56
NC_012920.1:1671-3229 :1029-1079	NEBNext Custom Depletion Tool	TAATAAATTAAAGCTCCATAGGGTCTTCTCGTCTTGCTGTGTTATGCCCG	50
NC_012920.1:1671-3229 :1061-1111	NEBNext Custom Depletion Tool	GGACCTGTGGGTTTGTTAGGTACTGTTTGCATTAATAAATTAAAGCTCCA	50
NC_012920.1:1671-3229 :1099-1141	NEBNext Custom Depletion Tool	CGAAATTTTTAATGCAGGTTTGGTAGTTTAGGACCTGTGGGT	42
NC_012920.1:1671-3229 :1141-1197	NEBNext Custom Depletion Tool	TGAAGTCTTAGCATGTACTGCTCGGAGGTTGGGTTCTGCTCCGAGGTCGCCCCAAC	56
NC_012920.1:1671-3229 :1174-1224	NEBNext Custom Depletion Tool	TTGAGTATAGTAGTTCGCTTTGACTGGTGAAGTCTTAGCATGTACTGCTC	50
NC_012920.1:1671-3229 :1216-1266	NEBNext Custom Depletion Tool	TCCCTAGGGTAACTTGTTCCGTTGGTCAAGTTATTGGATCAATTGAGTAT	50
NC_012920.1:1671-3229 :1258-1308	NEBNext Custom Depletion Tool	CCCTATTGTTGATATGGACTCTAGAATAGGATTGCGCTGTTATCCCTAGG	50
NC_012920.1:1671-3229 :1303-1344	NEBNext Custom Depletion Tool	CATCGGGATGTCCTGATCCAACATCGAGGTCGTAAACCCTA	41
NC_012920.1:1671-3229 :1340-1390	NEBNext Custom Depletion Tool	TAGGACTTTAATCGTTGAACAAACGAACCTTTAATAGCGGCTGCACCATC	50
NC_012920.1:1671-3229 :1374-1424	NEBNext Custom Depletion Tool	GACCTGGATTACTCCGGTCTGAACTCAGATCACGTAGGACTTTAATCGTT	50
NC_012920.1:1671-3229 :1410-1460	NEBNext Custom Depletion Tool	TTTCGTACAGGGAGGAATTTGAAGTAGATAGAAACCGACCTGGATTACTC	50
NC_012920.1:1671-3229 :1450-1498	NEBNext Custom Depletion Tool	GAAGGCGCTTTGTGAAGTAGGCCTTATTTCTCTTGTCCTTTCGTACAG	48
NC_012920.1:1671-3229 :1482-1540	NEBNext Custom Depletion Tool	GTGTGGGTATAATACTAAGTTGAGATGATATCATTTACGGGGGAAGGCGCTTTGTGAA	58
NC_012920.1:1671-3229 :1513-1558	NEBNext Custom Depletion Tool	AACCCTGTTCTTGGGTGGGTGTGGGTATAATACTAAGTTGAGATG	45

## Sheet: 12s rRNA probes
Target Ribosomal RNA: 12s rRNA	Designed Using	Probe Sequence	Length
NC_012920.1:648-1601 H:26-67	NEBNext Custom Depletion Tool	GGAACGGGGATGCTTGCATGTGTAATCTTACTAAGAGCTAA	41
NC_012920.1:648-1601 H:63-113	NEBNext Custom Depletion Tool	GATGCTTGTTCCTTTTGATCGTGGTGATTTAGAGGGTGAACTCACTGGAA	50
NC_012920.1:648-1601 H:94-144	NEBNext Custom Depletion Tool	TAAGCGTTTTGAGCTGCATTGCTGCGTGCTTGATGCTTGTTCCTTTTGAT	50
NC_012920.1:648-1601 H:124-181	NEBNext Custom Depletion Tool	TTAATCACTGCTGTTTCCCGTGGGGGTGTGGCTAGGCTAAGCGTTTTGAGCTGCATT	57
NC_012920.1:648-1601 H:158-208	NEBNext Custom Depletion Tool	AGTTAAACTTTCGTTTATTGCTAAAGGTTAATCACTGCTGTTTCCCGTGG	50
NC_012920.1:648-1601 H:194-244	NEBNext Custom Depletion Tool	GCACGAAATTGACCAACCCTGGGGTTAGTATAGCTTAGTTAAACTTTCGT	50
NC_012920.1:648-1601 H:228-283	NEBNext Custom Depletion Tool	TTCTATTGACTTGGGTTAATCGTGTGACCGCGGTGGCTGGCACGAAATTGACCAA	55
NC_012920.1:648-1601 H:260-310	NEBNext Custom Depletion Tool	GTGATCTAAAACACTCTTTACGCCGGCTTCTATTGACTTGGGTTAATCGT	50
NC_012920.1:648-1601 H:294-348	NEBNext Custom Depletion Tool	TTACAACTCAGGTGAGTTTTAGCTTTATTGGGGAGGGGGTGATCTAAAACACTC	54
NC_012920.1:648-1601 H:338-388	NEBNext Custom Depletion Tool	AAGCCACTTTCGTAGTCTATTTTGTGTCAACTGGAGTTTTTTACAACTCA	50
NC_012920.1:648-1601 H:370-420	NEBNext Custom Depletion Tool	GGGTCTTAGCTATTGTGTGTTCAGATATGTTAAAGCCACTTTCGTAGTCT	50
NC_012920.1:648-1601 H:419-471	NEBNext Custom Depletion Tool	TTAACTGTTGAGGTTTAGGGCTAAGCATAGTGGGGTATCTAATCCCAGTTTG	52
NC_012920.1:648-1601 H:451-501	NEBNext Custom Depletion Tool	CGTAGTGTTCTGGCGAGCAGTTTTGTTGATTTAACTGTTGAGGTTTAGGG	50
NC_012920.1:648-1601 H:490-543	NEBNext Custom Depletion Tool	ATATGAAGCACCGCCAGGTCCTTTGAGTTTTAAGCTGTGGCTCGTAGTGTTCT	53
NC_012920.1:648-1601 H:532-579	NEBNext Custom Depletion Tool	GGGTTTATCGATTACAGAACAGGCTCCTCTAGAGGGATATGAAGCAC	47
NC_012920.1:648-1601 H:565-615	NEBNext Custom Depletion Tool	GTATATAGGCTGAGCAAGAGGTGGTGAGGTTGATCGGGGTTTATCGATTA	50
NC_012920.1:648-1601 H:606-655	NEBNext Custom Depletion Tool	CTTACTTTGTAGCCTTCATCAGGGTTTGCTGAAGATGGCGGTATATAGG	49
NC_012920.1:648-1601 H:643-693	NEBNext Custom Depletion Tool	CTACACCTTGACCTAACGTCTTTACGTGGGTACTTGCGCTTACTTTGTAG	50
NC_012920.1:648-1601 H:683-729	NEBNext Custom Depletion Tool	GTAGAAAATGTAGCCCATTTCTTGCCACCTCATGGGCTACACCTTG	46
NC_012920.1:648-1601 H:714-766	NEBNext Custom Depletion Tool	CCCTTAAGTTTCATAAGGGCTATCGTAGTTTTCTGGGGTAGAAAATGTAGCC	52
NC_012920.1:648-1601 H:746-796	NEBNext Custom Depletion Tool	CTCTTAGTTTACTGCTAAATCCACCTTCGACCCTTAAGTTTCATAAGGGC	50
NC_012920.1:648-1601 H:778-826	NEBNext Custom Depletion Tool	CTTCAGGGCCCTGTTCAACTAAGCACTCTACTCTTAGTTTACTGCTAA	48
NC_012920.1:648-1601 H:823-878	NEBNext Custom Depletion Tool	TTAAATGTCCTTTGAAGTATACTTGAGGAGGGTGACGGGCGGTGTGTACGCGCTT	55
NC_012920.1:648-1601 H:866-917	NEBNext Custom Depletion Tool	ACGACTTGTCTCCTCTATATAAATGCGTAGGGGTTTTAGTTAAATGTCCTT	51
NC_012920.1:648-1601 H:898-948	NEBNext Custom Depletion Tool	CAAGTGCACTTTCCAGTACACTTACCATGTTACGACTTGTCTCCTCTATA	50

## Sheet: 5.8s rRNA probes
Target Ribosomal RNA: 5.8s rRNA	Designed Using	Probe Sequence	Length
NR_003285.3 Homo sapie:17-75	NEBNext Custom Depletion Tool	AATTCACATTAATTCTCGCAGCTAGCTGCGTTCTTCATCGACGCACGAGCCGAGTGAT	58
NR_003285.3 Homo sapie:51-101	NEBNext Custom Depletion Tool	AAGTGTCGATGATCAATGTGTCCTGCAATTCACATTAATTCTCGCAGCTA	50
NR_003285.3 Homo sapie:81-121	NEBNext Custom Depletion Tool	CGGGGCCGCAAGTGCGTTCGAAGTGTCGATGATCAATGTG	40
NR_003285.3 Homo sapie:117-157	NEBNext Custom Depletion Tool	AGCGACGCTCAGACAGGCGTAGCCCCGGGAGGAACCCGGG	40

## Sheet: 5s rRNA probes
Target Ribosomal RNA : 5s rRNA	Designed Using	Probe Sequence	Length
V00589.1 Human 5S ribo:19-60	NEBNext Custom Depletion Tool	CTGCTTAGCTTCCGAGATCAGACGAGATCGGGCGCGTTCAG	41
V00589.1 Human 5S ribo:67-107	NEBNext Custom Depletion Tool	CGGTATTCCCAGGCGGTCTCCCATCCAAGTACTAACCAGG	40
