# Supplementary material
Source: HighWire-hosted journal article supplement (doi:10.1101/rna.079761.123)
Supplement: Supplemental_Table_2.xlsx [file Supplemental_Table_2.xlsx]

## Sheet: Probe Off targets
probeID	transcript(off-target)	refseq_ncrna
V00589.1 Human 5S ribo:19-60_5s	NM_001040110	NRF1
V00589.1 Human 5S ribo:19-60_5s	NM_001199922	SIAE
V00589.1 Human 5S ribo:19-60_5s	NM_001271900	PPP2R2B
V00589.1 Human 5S ribo:19-60_5s	NM_001348262	TBC1D25
V00589.1 Human 5S ribo:19-60_5s	NM_001363583	MIGA1
V00589.1 Human 5S ribo:19-60_5s	NM_138571	HINT3
V00589.1 Human 5S ribo:19-60_5s	NR_146625	LINC00537
V00589.1 Human 5S ribo:19-60_5s	XM_017016104	RBM20
V00589.1 Human 5S ribo:19-60_5s	XR_001742904	LOC105378198
V00589.1 Human 5S ribo:19-60_5s	XR_001743859	LOC102723409
V00589.1 Human 5S ribo:19-60_5s	XR_947565	LOC105378834
V00589.1 Human 5S ribo:67-107_5s	NR_146625	LINC00537
V00589.1 Human 5S ribo:67-107_5s	XR_937748	LOC105372814
NR_003285.3 Homo sapie:81-121_5.8s	NM_001256523	ZNF74
NR_003285.3 Homo sapie:81-121_5.8s	XR_001745759	LOC105379585
NR_003285.3 Homo sapie:81-121_5.8s	XR_951727	LOC105379585
NR_003285.3 Homo sapie:117-157_5.8s	NM_001171815	RNF166
NR_003285.3 Homo sapie:117-157_5.8s	NM_001286581	PHRF1
NC_012920.1:648-1601 606-655_12s	NM_198989	DLEU7
NC_012920.1:1671-3229 :422-464_16s	NR_109941	MEF2C-AS1
NC_012920.1:1671-3229 :818-867_16s	NM_001004304	ZNF740
NR_003287.4 Homo sapie:731-777_28s	NM_005497	GJC1
NR_003287.4 Homo sapie:879-919_28s	NM_001025247	TAF5L
NR_003287.4 Homo sapie:879-919_28s	NM_001137560	TMEM151B
NR_003287.4 Homo sapie:879-919_28s	NM_001321617	CALY
NR_003287.4 Homo sapie:879-919_28s	NM_005429	VEGFC
NR_003287.4 Homo sapie:879-919_28s	NM_024646	ZYG11B
NR_003287.4 Homo sapie:879-919_28s	NM_030636	EEPD1
NR_003287.4 Homo sapie:879-919_28s	NM_173527	REM2
NR_003287.4 Homo sapie:943-984_28s	NM_001136041	HDAC11
NR_003287.4 Homo sapie:943-984_28s	NM_002949	MRPL12
NR_003287.4 Homo sapie:943-984_28s	NM_016932	SIX2
NR_003287.4 Homo sapie:1029-1069_28s	NM_001100829	TMEM170B
NR_003287.4 Homo sapie:1029-1069_28s	NM_001130012	NHERF2/SLC9A3R2
NR_003287.4 Homo sapie:1029-1069_28s	NM_001131062	SAP30L
NR_003287.4 Homo sapie:1029-1069_28s	NM_001136215	ARTN
NR_003287.4 Homo sapie:1029-1069_28s	NM_001145033	C11orf96
NR_003287.4 Homo sapie:1029-1069_28s	NM_001145373	OTUD1
NR_003287.4 Homo sapie:1029-1069_28s	NM_001242816	DEF8
NR_003287.4 Homo sapie:1029-1069_28s	NM_001270485	CAMKK2
NR_003287.4 Homo sapie:1029-1069_28s	NM_001366673	DPY19L1
NR_003287.4 Homo sapie:1029-1069_28s	NM_001378964	CDON
NR_003287.4 Homo sapie:1029-1069_28s	NM_001384611	DPP9
NR_003287.4 Homo sapie:1029-1069_28s	NM_002586	PBX2
NR_003287.4 Homo sapie:1029-1069_28s	NM_003378	VGF
NR_003287.4 Homo sapie:1029-1069_28s	NM_003388	CLIP2
NR_003287.4 Homo sapie:1029-1069_28s	NM_004416	DTX1
NR_003287.4 Homo sapie:1029-1069_28s	NM_020814	MARCHF4
NR_003287.4 Homo sapie:1029-1069_28s	NM_152390	TMEM178A
NR_003287.4 Homo sapie:1029-1069_28s	NM_194449	PHLPP1
NR_003287.4 Homo sapie:1029-1069_28s	NM_198532	PEAK3
NR_003287.4 Homo sapie:1029-1069_28s	NR_024421	ZNF503-AS2
NR_003287.4 Homo sapie:1029-1069_28s	NR_136525	LOC105372383
NR_003287.4 Homo sapie:1029-1069_28s	XM_024446323	IP6K3
NR_003287.4 Homo sapie:1029-1069_28s	XR_936239	LOC105372238
NR_003287.4 Homo sapie:1142-1194_28s	NM_001126181	NRGN
NR_003287.4 Homo sapie:1142-1194_28s	NM_004143	CITED1
NR_003287.4 Homo sapie:1142-1194_28s	NM_032430	BRSK1
NR_003287.4 Homo sapie:1142-1194_28s	NM_138346	KIAA2013
NR_003287.4 Homo sapie:1142-1194_28s	NM_203296	TRIM7
NR_003287.4 Homo sapie:1142-1194_28s	NR_160977	LINC02901
NR_003287.4 Homo sapie:1252-1305_28s	NM_001032280	TFAP2A
NR_003287.4 Homo sapie:1252-1305_28s	NM_004625	WNT7A
NR_003287.4 Homo sapie:1252-1305_28s	XR_001737882	LOC107984913
NR_003287.4 Homo sapie:1316-1356_28s	NM_001323916	FNIP2
NR_003287.4 Homo sapie:2024-2064_28s	XM_005255633	NUDT16L1
NR_003287.4 Homo sapie:2024-2064_28s	XR_001749129	LOC105369763
NR_003287.4 Homo sapie:2620-2663_28s	NM_021999	ITM2B
NR_003287.4 Homo sapie:2904-2962_28s	NM_001323656	ZEB1
NR_003287.4 Homo sapie:2904-2962_28s	XR_941565	RGCC
NR_003287.4 Homo sapie:3187-3234_28s	NM_001252296	CEBPG
NR_003287.4 Homo sapie:3187-3234_28s	NM_001394736	PHACTR2
NR_003287.4 Homo sapie:3187-3234_28s	NM_004186	SEMA3F
NR_003287.4 Homo sapie:3259-3299_28s	NM_001013841	STAP2
NR_003287.4 Homo sapie:3259-3299_28s	NM_001079843	CASZ1
NR_003287.4 Homo sapie:3259-3299_28s	NM_001145425	NR1D2
NR_003287.4 Homo sapie:3259-3299_28s	NM_001190827	FAM217B
NR_003287.4 Homo sapie:3259-3299_28s	NM_001200001	NOTCH2
NR_003287.4 Homo sapie:3259-3299_28s	NM_001256105	WNT5A
NR_003287.4 Homo sapie:3259-3299_28s	NM_001270401	RXRB
NR_003287.4 Homo sapie:3259-3299_28s	NM_001291815	HMCN2
NR_003287.4 Homo sapie:3259-3299_28s	NM_001316690	CHD7
NR_003287.4 Homo sapie:3259-3299_28s	NM_001350960	IMMP2L
NR_003287.4 Homo sapie:3259-3299_28s	NM_001351273	APC2
NR_003287.4 Homo sapie:3259-3299_28s	NM_001364007	NOTCH2NLB
NR_003287.4 Homo sapie:3259-3299_28s	NM_001366796	ZNF713
NR_003287.4 Homo sapie:3259-3299_28s	NM_002852	PTX3
NR_003287.4 Homo sapie:3259-3299_28s	NM_005765	ATP6AP2
NR_003287.4 Homo sapie:3259-3299_28s	NM_005929	MELTF
NR_003287.4 Homo sapie:3259-3299_28s	NM_007013	WWP1
NR_003287.4 Homo sapie:3259-3299_28s	NM_012104	BACE1
NR_003287.4 Homo sapie:3259-3299_28s	NM_022160	DMRTA1
NR_003287.4 Homo sapie:3259-3299_28s	NM_032345	PYM1
NR_003287.4 Homo sapie:3259-3299_28s	NM_052853	ADCK2
NR_003287.4 Homo sapie:3259-3299_28s	NR_026991	H1-10-AS1
NR_003287.4 Homo sapie:3259-3299_28s	XM_005261195	PDXK
NR_003287.4 Homo sapie:3259-3299_28s	XM_006719600	TCTN1
NR_003287.4 Homo sapie:3259-3299_28s	XR_947157	LOC105378629
NR_003287.4 Homo sapie:3323-3376_28s	NM_001093725	MEX3A
NR_003287.4 Homo sapie:3323-3376_28s	NM_001110199	SRRM3
NR_003287.4 Homo sapie:3323-3376_28s	NM_001287036	KIAA1958
NR_003287.4 Homo sapie:3684-3734_28s	NM_031451	TEX101
NR_003287.4 Homo sapie:3715-3765_28s	NR_039981	LINC01004
NR_003287.4 Homo sapie:4001-4051_28s	NM_001203258	MTA1
NR_003287.4 Homo sapie:4001-4051_28s	NM_001323983	CTNNA1
NR_003287.4 Homo sapie:4001-4051_28s	NR_134244	CTNNA1-AS1
NR_003287.4 Homo sapie:4063-4103_28s	NM_001652	AQP6
NR_003287.4 Homo sapie:4456-4506_28s	NM_018728	MYO5C
NR_003287.4 Homo sapie:4696-4736_28s	NR_109996	PRKAR2A-AS1
NR_003287.4 Homo sapie:4805-4860_28s	NM_000814	GABRB3
NR_003287.4 Homo sapie:4805-4860_28s	NM_012120	CD2AP
NR_003287.4 Homo sapie:4904-4958_28s	NM_001354259	EHMT1
NR_003287.4 Homo sapie:4904-4958_28s	NM_153813	ZFPM1
NR_003287.4 Homo sapie:5000-5050_28s	NM_203472	SELENOS
