# Supplementary material
Source: HighWire-hosted journal article supplement (doi:10.1101/rna.079761.123)
Supplement: Supplemental_Table_3.xlsx [file Supplemental_Table_3.xlsx]

## Sheet: Sheet1
	Gene	Primer Sequence
	GAPDH FP	GAGCCAAAAGGGTCATCATC
	GAPDH RP	GGTGCTAAGCAGTTGGTGGT
	ACTIN FP	GAGGCACTCTTCCAGCCTT
	ACTIN RP	AAGGTAGTTTCGTGGATGCC
	28S RP	TCATCAGACCCCAGAAAAGG
	28S FP	GTTGATTCGGCAGGTGAGTT
	5.8S FP	GTCGATGAAGAACGCAGCTA
	5.8S RP	AGTGCGTTCGAAGTGTCGAT
	5S FP	TCTCGTCTGATCTCGGAAGC
	5S RP	AGCCTACAGCACCCGGTATT
	12S FP	ACCACCTCTTGCTCAGCCTA
	12S RP	CATGGGCTACACCTTGACCT
	16S FP	GCAAGGAGAGCCAAAGCTAA
	16S RP	TGGACAACCAGCTATCACCA
	18S FP	CTCAACACGGGAAACCTCAC
	18S RP	CGCTCCACCAACTAAGAACG
	Mouse/rat 16S FP	ACTCGGCAAATCTTACCCCG
	Mouse/rat 16S RP	TCACGGGCAGGTCAATTTCA
	Mouse/Rat 5.8S FP	TGCGTCGATGAAGAACGCAG
	Mouse/Rat 5.8S RP	AAGCGACGCTCAGACAGG
	cZKSCAN1 FP	CCTCGAGCTTTGACCTTCATCACG
	cZKSCAN1 RP	CTCACCTTTATGTCCTGGGAGGT
	cPLOD2 FP	GGCTGACTGCATAAATCGATGGAATC
	cPLOD2 RP	GTCATGGAACACTATGCTGATCAAGA
	cHIPK3 FP	GGCAGCCTTACAGGGTTAAA
	cHIPK3 RP	GGGTAGACCAAGACTTGTGAGG
	H1 RT FP	CCTGTAAAGAAGAAGGCGGCCAAA
	H1 RT RP	CAGAGAAACTCCGCTACGCTCTTT
	H2A RT FP	AGCTCAACAAGCTTCTGGGCAA
	H2A RT RP	TTGTGGTGGCTCTCGGTCTTCTT
	H2B RT FP	TGCGCCCAAGAAGGGTTCTAAA
	H2B RT RP	ACGAAGGAGTTCATGATGCCCA
	H3 RT FP	TGCTCATCCGCAAACTGCCATT
	H3 RT RP	AGTGACACGCTTGGCGTGAATA
	H4 RT FP	ACCGTAAAGTACTGCGCGACAA
	H4 RT RP	TTCTCCAGGAACACCTTCAGCA
	MALAT1 FP	TCCCCACAAGCAACTTCTCT
	MALAT1 RP	CCTCGACACCATCGTTACCT
	HOTAIR RT FP	GACCAACACCCCTGCTCC
	HOTAIR RT RP	TGGGCTCCCTCTCTCCAC
	HERV-E FP	GGTGTCACTACTCAATACAC
	HERV-E RP	GCAGCCTAGGTCTCTGG
	HERV -F FP	CCTCCAGTCACAACAACTC
	HERV-F RP	TATTGAAGAAGGCGGCTGG
	HERV-K FP	ATTGGCAACACCGTATTCTGCT
	HERV-K RP	CAGTCAAAATATGGACGGATGGT
	U6 FP	GCTTCGGCAGCACATATACTAA
	U6 RP	TCACGAATTTGCGTGTCATC
	U1 FP	CCACAAATTATGCAGTCAAGTTTCCCA
	U1 RP	CCATGATCACGAAGGTGGTTTTCC
	U5 FP	CTTCAGATCGCATAAATCTTTCGCCTT
	U5 RP	CAAAAAATTGGGTTAAGACTCAGAGTTGTTCC
